# Supplementary material for: Temporal trends in microplastic accumulation in placentas from pregnancies in Hawai‘i
Source: PubMed Central journal article supplement — Environ Int. Author manuscript; Available in PMC 2023 Oct 23. (PMC10593309; doi:10.1016/j.envint.2023.108220), 2023-09-20
Supplement: NIHMS1937911-supplement-1.pdf [file NIHMS1937911-supplement-1.pdf]

## Temporal trends in microplastic accumulation in placentas from pregnancies in Hawaii

Rodrigo Barbano Weingrill<sup>a\*</sup>, Men-Jean Lee<sup>b\*</sup>, Paula Benny<sup>b</sup>, Jonathan Riel<sup>b</sup>, Kevin Saiki<sup>b</sup>, Jacob Garcia<sup>b</sup>, Lais Farias Azevedo de Magalhaes Oliveira<sup>c</sup>, Eduardo Jorge da Silva Fonseca<sup>c</sup>, Samuel Teixeira de Souza<sup>c</sup>, Flavio de Oliveira Silva D'Amato<sup>c</sup>, Ueslen Rocha Silva<sup>c</sup>, Mariana Lima Dutra<sup>d</sup>, Aldilane Lays Xavier Marques<sup>d</sup>, Alexandre Urban Borbely<sup>d\*</sup> and Johann Urschitz<sup>a\*</sup>

<sup>a</sup> Institute for Biogenesis Research, Department of Anatomy, Biochemistry, and Physiology, John A. Burns School of Medicine, University of Hawai'i at Manoa, Honolulu, Hawaii, USA.

<sup>b</sup> Department of Obstetrics and Gynecology, John A. Burns School of Medicine, University of Hawaii, Honolulu, Hawaii, USA.

<sup>c</sup> Physics Institute, Federal University of Alagoas, Maceio, Alagoas, Brazil

<sup>d</sup> Institute of Biological and Health Sciences, Federal University of Alagoas, Campus A.C. Simões, Maceio, Alagoas, Brazil

Corresponding author: [johann@hawaii.edu](mailto:johann@hawaii.edu)

### Supplementary Material:

Supplementary Figures: 1-3

Supplementary Tables: 1-3

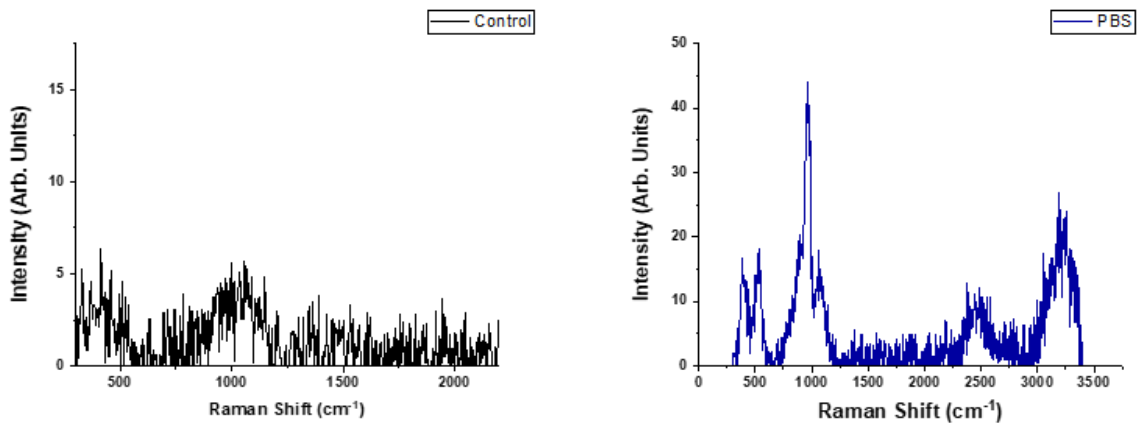

**Supplementary Figure 1:** Control glass fiber filter membranes (47mm; Whatman GF/A, Sigma-Aldrich, St. Louis, MO, USA). **(A)** environment (air) control; **(B)** Phosphate Buffer Saline (PBS) (XploRA Raman spectrometry (spectral range 300–2200  $\text{cm}^{-1}$ , 532 and 785 nm laser diodes, 600 lines per mm grating, Horiba, Japan).

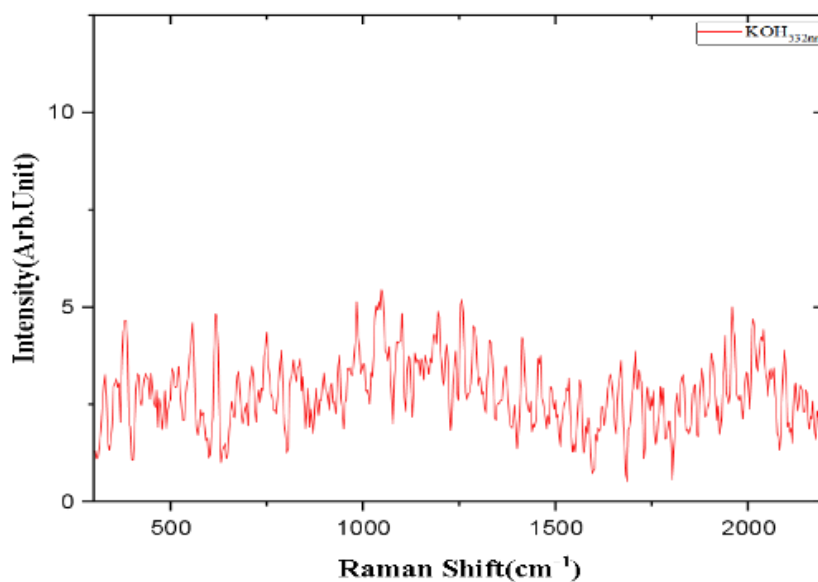

**Supplementary Figure 2:** Control glass fiber filter membranes (47mm; Whatman GF/A, Sigma-Aldrich, St. Louis, MO, USA). KOH solution control (XploRA Raman spectrometry (spectral range 300–2200  $\text{cm}^{-1}$ , 532 and 785 nm laser diodes, 600 lines per mm grating, Horiba, Japan).

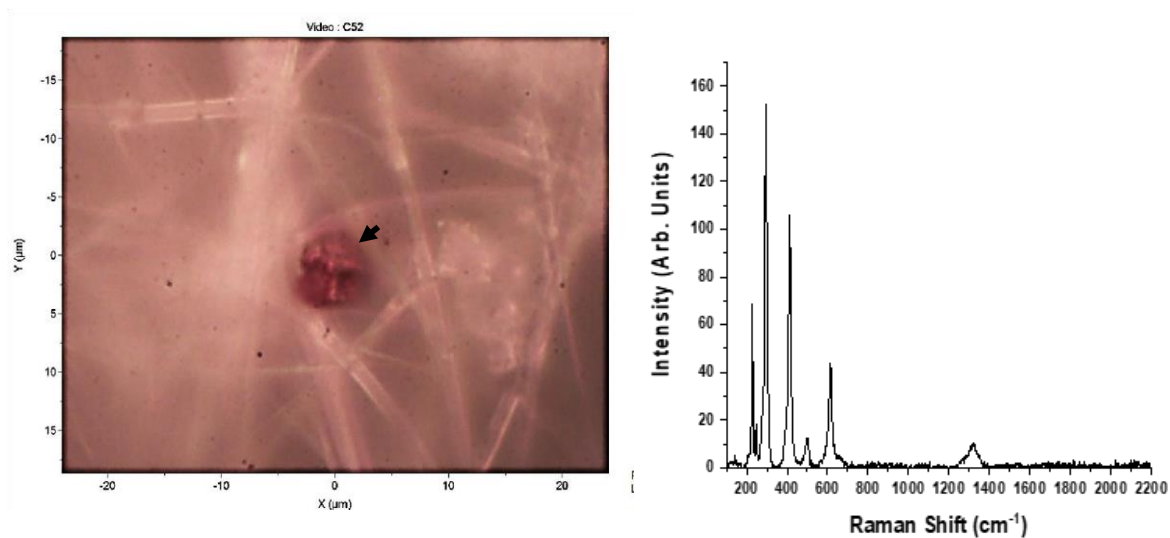

**Supplementary Figure 3:** (A) Arrow indicates a PVA red-colored MP particle trapped in glass fiber filter visualized under light microscopy (100 x objective (Olympus PlanFL N 100x/0.95) (47mm; Whatman GF/A, Sigma-Aldrich, St. Louis, MO, USA);(B) Corresponding Raman Spectra for PVA XploRA Raman spectrometry (spectral range 300–2200 cm<sup>-1</sup>, 532 and 785 nm laser diodes, 600 lines per mm grating, Horiba, Japan).

| Year | Placenta | N° of MP Particles | Length | Color       | Shape     | Polymer                    | Additives                            |
|------|----------|--------------------|--------|-------------|-----------|----------------------------|--------------------------------------|
| 2006 | 1        | 1                  | 4 µm   | Red         | Irregular | Polypropylene              | Mercuric oxide red, titanium dioxide |
|      |          | 2                  | 4 µm   | Transparent | Irregular | Unable to Identify         |                                      |
|      |          | 3                  | 4 µm   | Blue        | Irregular | Polypropylene              | Titanium dioxide                     |
|      |          | 4                  | 8 µm   | Blue        | Irregular | Polyamide                  | Titanium dioxide                     |
| 2006 | 2        | 1                  | 3 µm   | Transparent | Irregular | Polyurethane               |                                      |
|      |          | 2                  | 2 µm   | Transparent | Sphere    | Polyester                  |                                      |
| 2006 | 3        | 1                  | 3 µm   | Transparent | Irregular | Polyethylene Vinyl Acetate |                                      |
|      |          | 2                  | 3 µm   | Transparent | Irregular | Polyethylene Terephthalate |                                      |
|      |          | 3                  | 2 µm   | Transparent | Sphere    | Polyurethane               |                                      |
|      |          | 4                  | 3 µm   | Transparent | Irregular | Polyethylene Vinyl Acetate |                                      |
| 2006 | 4        | 1                  | 1 µm   | Transparent | Sphere    | Polyurethane               |                                      |
|      |          | 2                  | 2 µm   | Transparent | Sphere    | Polypropylene              |                                      |
| 2006 | 5        | 1                  | 2 µm   | Transparent | Irregular | Polyvinyl Chloride         |                                      |
|      |          | 2                  | 2 µm   | Transparent | Irregular | Polyvinyl Chloride         |                                      |
|      |          | 3                  | 2 µm   | Transparent | Sphere    | Polyvinyl Chloride         |                                      |
|      |          | 4                  | 2 µm   | Transparent | Sphere    | Polyethylene               |                                      |
|      |          | 5                  | 1 µm   | Transparent | Sphere    | Polyester                  |                                      |
|      |          | 6                  | 2 µm   | Transparent | Sphere    | Polyester                  |                                      |
| 2006 | 6        | 1                  | 3 µm   | Transparent | Irregular | Polyester                  |                                      |
|      |          | 2                  | 4 µm   | Transparent | Sphere    | Polyester                  | Titanium dioxide                     |
|      |          | 3                  | 3 µm   | Transparent | Sphere    | Polypropylene              | Titanium dioxide                     |
|      |          | 4                  | 3 µm   | Transparent | Sphere    | Polypropylene              | Titanium dioxide                     |

**Supplementary Table 1:** Description of microplastic polymers detected in human placentas from 2006(6/10). (XploRA Raman spectrometry (spectral range 300–2200 cm<sup>-1</sup>, 532 and 785 nm laser diodes, 600 lines per mm grating, library (KnowItAll - Wiley Science Solutions, Hoboken, NJ, USA; Horiba, Japan; Spectral SLOPP/SLOPpe libraries).

| Year | Placenta | N° of MP Particles | Length | Color       | Shape     | Polymer                         | Additives                                 |
|------|----------|--------------------|--------|-------------|-----------|---------------------------------|-------------------------------------------|
| 2013 | 1        | 1                  | 4 µm   | Transparent | Sphere    | Polyethylene Terephthalate      |                                           |
|      |          | 2                  | 4 µm   | Transparent | Sphere    | Unable to Identify              | Acidic blue 113                           |
|      |          | 3                  | 4 µm   | Transparent | Sphere    | Acrylonitrile Butadiene Styrene | Titanium dioxide                          |
|      |          | 4                  | 4 µm   | Transparent | Sphere    | Polyethylene Terephthalate      |                                           |
|      |          | 5                  | 11 µm  | Transparent | Irregular | Polyamide                       |                                           |
|      |          | 6                  | 5 µm   | Blue        | Irregular | Polyacrylonitrile               | Titanium dioxide                          |
| 2013 | 2        | 1                  | 5 µm   | Transparent | Sphere    | Polyurethane                    |                                           |
|      |          | 2                  | 3 µm   | Transparent | Irregular | Polyethylene                    |                                           |
|      |          | 3                  | 3 µm   | Transparent | Sphere    | Polyamide                       |                                           |
|      |          | 4                  | 10 µm  | Transparent | Irregular | Polyurethane                    | N,N-Dimethyl-4-Nitroaniline               |
| 2013 | 3        | 1                  | 6 µm   | Transparent | Irregular | Polyethylene Vinyl Acetate      |                                           |
|      |          | 2                  | 6 µm   | Transparent | Sphere    | Polypropylene                   |                                           |
|      |          | 3                  | 4 µm   | Transparent | Sphere    | Unable to Identify              | 4,4'-Methylenebis (N,N-Diglycidylaniline) |
|      |          | 4                  | 4 µm   | Transparent | Sphere    | Polyethylene Terephthalate      |                                           |
| 2013 | 4        | 1                  | 6 µm   | Green       | Irregular | Polyester                       |                                           |
|      |          | 2                  | 4 µm   | Transparent | Irregular | Polyvinyl Alcohol               |                                           |
|      |          | 3                  | 4 µm   | Transparent | Sphere    | Polypropylene                   |                                           |
|      |          | 4                  | 12 µm  | White       | Sphere    | Polyester                       |                                           |
| 2013 | 5        | 1                  | 6 µm   | Red         | Sphere    | Polyethylene Vinyl Acetate      | Indigo                                    |
|      |          | 2                  | 9 µm   | Transparent | Irregular | Polyethylene Vinyl Acetate      |                                           |
|      |          | 3                  | 9 µm   | Transparent | Irregular | Acrylonitrile Butadiene Styrene |                                           |
|      |          | 4                  | 4 µm   | Orange      | Sphere    | Polyethylene Vinyl Acetate      |                                           |
|      |          | 5                  | 14 µm  | Transparent | Sphere    | Polypropylene                   |                                           |
| 2013 | 6        | 1                  | 6 µm   | Blue        | Sphere    | Unable to Identify              | Indigo                                    |
|      |          | 2                  | 6 µm   | White       | Irregular | Polycarbonate                   |                                           |
|      |          | 3                  | 6 µm   | Blue        | Sphere    | Polycarbonate                   | Victoria Blue B (C.I. 44045), Bisphenol A |
|      |          | 4                  | 7 µm   | Red         | Sphere    | Unable to Identify              |                                           |
| 2013 | 7        | 1                  | 4 µm   | Transparent | Sphere    | Polyethylene                    |                                           |

|      |   |   |                  |             |           |                                       |  |
|------|---|---|------------------|-------------|-----------|---------------------------------------|--|
|      |   | 2 | 6 $\mu\text{m}$  | White       | Sphere    | Acrylonitrile<br>Butadiene<br>Styrene |  |
|      |   | 3 | 4 $\mu\text{m}$  | Orange      | Irregular | Polyethylene<br>Terephthalate         |  |
|      |   | 4 | 5 $\mu\text{m}$  | Transparent | Irregular | Unable to<br>Identify                 |  |
| 2013 | 8 | 1 | 3 $\mu\text{m}$  | Transparent | Irregular | Polypropylene                         |  |
|      |   | 2 | 3 $\mu\text{m}$  | Transparent | Irregular | Polypropylene                         |  |
|      |   | 3 | 2 $\mu\text{m}$  | Transparent | Sphere    | Polypropylene                         |  |
|      |   | 4 | 17 $\mu\text{m}$ | Transparent | Irregular | Polyester                             |  |
| 2013 | 9 | 1 | 15 $\mu\text{m}$ | Transparent | Irregular | Polyvinyl<br>Chloride                 |  |
|      |   | 2 | 7 $\mu\text{m}$  | Transparent | Irregular | Unable to<br>Identify                 |  |
|      |   | 3 | 5 $\mu\text{m}$  | Transparent | Irregular | Polyester                             |  |

**Supplementary Table 2:** Description of microplastic polymers detected in human placentas from 2013(9/10). (XploRA Raman spectrometry (spectral range 300–2200  $\text{cm}^{-1}$ , 532 and 785 nm laser diodes, 600 lines per mm grating, library (KnowItAll - Wiley Science Solutions, Hoboken, NJ, USA; Horiba, Japan; Spectral SLOPP/SLOPPe libraries).

| Year | Placenta | N° of MP Particles | Length | Color       | Shape     | Polymer                    | Additives                   |
|------|----------|--------------------|--------|-------------|-----------|----------------------------|-----------------------------|
| 2021 | 1        | 1                  | 22 µm  | Transparent | Sphere    | Polyethylene Terephthalate |                             |
|      |          | 2                  | 37 µm  | Transparent | Sphere    | Polystyrene                |                             |
|      |          | 3                  | 44 µm  | Transparent | Irregular | Polystyrene                |                             |
|      |          | 4                  | 10 µm  | Red         | Sphere    | Polyethylene Vinyl Acetate | Indigo Blue                 |
|      |          | 5                  | 6 µm   | Blue        | Sphere    | Polypropylene              | Patent Blue VF (C.I. 42045) |
| 2021 | 2        | 1                  | 20 µm  | White       | Irregular | Polyester                  | Bisphenol A                 |
|      |          | 2                  | 6 µm   | Red         | Sphere    | Polypropylene              | Diisooctyl Adipate          |
|      |          | 3                  | 4 µm   | Transparent | Sphere    | Polycarbonate              |                             |
|      |          | 4                  | 5 µm   | Transparent | Irregular | Polyethylene Terephthalate |                             |
|      |          | 5                  | 3 µm   | Transparent | Irregular | Unable to Identify         |                             |
|      |          | 6                  | 5 µm   | Transparent | Sphere    | Polypropylene              | Acid Red 37 (C.I. 17045)    |
|      |          | 7                  | 3 µm   | Transparent | Irregular | Polyurethane               |                             |
|      |          | 8                  | 4 µm   | Blue        | Irregular | Polycarbonate              | Cyclohexane-d12             |
| 2021 | 3        | 1                  | 2 µm   | Transparent | Irregular | Polyvinyl Chloride         | Diocetyl phtalate           |
|      |          | 2                  | 3 µm   | Transparent | Irregular | Polyethylene Vinyl Acetate |                             |
|      |          | 3                  | 3 µm   | Transparent | Irregular | Polyester                  | Bisphenol A                 |
|      |          | 4                  | 7 µm   | Red         | Irregular | Polyethylene Terephthalate |                             |
| 2021 | 4        | 1                  | 2 µm   | Transparent | Irregular | Poly (Isoprene), Trans     | Brilliant Yellow            |
|      |          | 2                  | 3 µm   | Transparent | Irregular | Polyurethane               |                             |
|      |          | 3                  | 3 µm   | Transparent | Irregular | Polyethylene Terephthalate |                             |
|      |          | 4                  | 3 µm   | Orange      | Sphere    | Unable to Identify         |                             |
|      |          | 5                  | 4 µm   | Transparent | Irregular | Unable to Identify         |                             |
|      |          | 6                  | 3 µm   | White       | Irregular | Polyvinyl Chloride         |                             |
|      |          | 7                  | 5 µm   | Transparent | Irregular | Polycarbonate              |                             |
|      |          | 8                  | 2 µm   | White       | Irregular | Polyester                  |                             |
|      |          | 9                  | 7 µm   | White       | Sphere    | Polyethylene Vinyl Acetate |                             |
|      |          | 10                 | 3 µm   | White       | Irregular | Polyethylene Terephthalate |                             |

|      |   |   |                 |             |           |                               |             |
|------|---|---|-----------------|-------------|-----------|-------------------------------|-------------|
| 2021 | 5 | 1 | 2 $\mu\text{m}$ | Transparent | Irregular | Polyethylene                  |             |
|      |   | 2 | 3 $\mu\text{m}$ | Transparent | Irregular | Polyester                     | Bisphenol A |
|      |   | 3 | 5 $\mu\text{m}$ | White       | Sphere    | Polyethylene                  |             |
|      |   | 4 | 3 $\mu\text{m}$ | Transparent | Irregular | Polyethylene<br>Vinyl Acetate |             |
|      |   | 5 | 2 $\mu\text{m}$ | Transparent | Irregular | Polyethylene                  |             |
|      |   | 6 | 1 $\mu\text{m}$ | Transparent | Irregular | Polyvinyl<br>Chloride         |             |

|      |   |    |                  |             |           |                               |                                 |
|------|---|----|------------------|-------------|-----------|-------------------------------|---------------------------------|
|      |   | 7  | 1 $\mu\text{m}$  | Transparent | Irregular | Polyethylene<br>Terephthalate |                                 |
|      |   | 8  | 2 $\mu\text{m}$  | Transparent | Sphere    | Polyethylene<br>Vinyl Acetate | Victoria Blue B (C.I.<br>44045) |
|      |   | 9  | 4 $\mu\text{m}$  | White       | Sphere    | Polyester                     | Direct Yellow 62                |
|      |   | 10 | 12 $\mu\text{m}$ | Transparent | Irregular | Polypropylene                 | Titanium dioxide                |
|      |   | 11 | 8 $\mu\text{m}$  | White       | Irregular | Polyurethane                  | Titanium dioxide                |
| 2021 | 6 | 1  | 7 $\mu\text{m}$  | Transparent | Irregular | Unable to<br>Identify         | Bisphenol A                     |
|      |   | 2  | 2 $\mu\text{m}$  | White       | Sphere    | Unable to<br>Identify         | Acid Red 151 (C.I.<br>26900)    |
|      |   | 3  | 4 $\mu\text{m}$  | White       | Sphere    | Unable to<br>Identify         |                                 |
|      |   | 4  | 3 $\mu\text{m}$  | Transparent | Irregular | Polypropylene                 | Orange II                       |
| 2021 | 7 | 1  | 2 $\mu\text{m}$  | Transparent | Irregular | Polyamide                     |                                 |
|      |   | 2  | 2 $\mu\text{m}$  | Transparent | Irregular | Polypropylene                 |                                 |
|      |   | 3  | 1 $\mu\text{m}$  | Transparent | Irregular | Polyester                     |                                 |
|      |   | 4  | 1 $\mu\text{m}$  | Transparent | Sphere    | Polyester                     |                                 |
|      |   | 5  | 4 $\mu\text{m}$  | Transparent | Sphere    | Polyvinyl<br>Chloride         |                                 |
|      |   | 6  | 3 $\mu\text{m}$  | Transparent | Sphere    | Polypropylene                 |                                 |
|      |   | 7  | 4 $\mu\text{m}$  | Transparent | Irregular | Polyethylene<br>Vinyl Acetate | Acid Red 4 (C.I.<br>14710)      |
|      |   | 8  | 5 $\mu\text{m}$  | Transparent | Irregular | Unable to<br>Identify         |                                 |
| 2021 | 8 | 1  | 2 $\mu\text{m}$  | Transparent | Irregular | Polyethylene<br>Vinyl Acetate |                                 |
|      |   | 2  | 3 $\mu\text{m}$  | Blue        | Sphere    | Unable to<br>Identify         | Victoria Blue B (C.I.<br>44045) |
|      |   | 3  | 3 $\mu\text{m}$  | Transparent | Sphere    | PMMA                          |                                 |
|      |   | 4  | 2 $\mu\text{m}$  | Red         | Sphere    | Polyethylene<br>Vinyl Acetate |                                 |
|      |   | 5  | 1 $\mu\text{m}$  | Transparent | Sphere    | Polyethylene<br>Terephthalate | Titanium dioxide                |
|      |   | 6  | 5 $\mu\text{m}$  | Transparent | Sphere    | Polyethylene<br>Vinyl Acetate |                                 |



|      |    |    |      |             |           |                                 |                       |
|------|----|----|------|-------------|-----------|---------------------------------|-----------------------|
|      |    | 7  | 2 µm | Transparent | Sphere    | Polyester                       |                       |
|      |    | 8  | 4 µm | White       | Sphere    | Polyester                       |                       |
|      |    | 9  | 5 µm | Transparent | Irregular | Unable to Identify              |                       |
|      |    | 10 | 3 µm | White       | Sphere    | Polyacrylonitrile               |                       |
|      |    | 11 | 2 µm | Transparent | Irregular | Unable to Identify              |                       |
|      |    | 12 | 6 µm | Transparent | Irregular | Unable to Identify              |                       |
|      |    | 13 | 4 µm | Transparent | Irregular | Unable to Identify              |                       |
|      |    | 14 | 4 µm | Transparent | Irregular | Unable to Identify              |                       |
|      |    | 15 | 6 µm | Transparent | Irregular | Polycarbonate                   |                       |
|      |    | 16 | 3 µm | Transparent | Sphere    | Polyethylene                    |                       |
|      |    | 17 | 3 µm | Transparent | Sphere    | Polyethylene Terephthalate      |                       |
|      |    | 18 | 2 µm | Transparent | Irregular | Polyethylene Adipate            |                       |
|      |    | 19 | 4 µm | Transparent | Irregular | Polyethylene Terephthalate      |                       |
|      |    | 20 | 7 µm | Transparent | Sphere    | Polypropylene                   | Acid 151 (C.I. 26900) |
|      |    | 21 | 5 µm | Transparent | Irregular | Polyethylene Vinyl Acetate      |                       |
| 2021 | 9  | 1  | 8 µm | Transparent | Sphere    | Polypropylene                   | SL 5                  |
|      |    | 2  | 7 µm | Transparent | Irregular | Polyester                       |                       |
|      |    | 3  | 3 µm | Transparent | Irregular | Polyethylene                    |                       |
|      |    | 4  | 3 µm | Transparent | Irregular | Polyethylene                    |                       |
|      |    | 5  | 2 µm | Transparent | Irregular | Polyethylene                    | AC-316A               |
|      |    | 6  | 3 µm | Transparent | Irregular | Polyester                       |                       |
| 2021 | 10 | 1  | 4 µm | Transparent | Irregular | Unable to Identify              |                       |
|      |    | 2  | 2 µm | Transparent | Irregular | Polyethylene Terephthalate      |                       |
|      |    | 3  | 4 µm | Transparent | Irregular | Polyurethane                    |                       |
|      |    | 4  | 5 µm | Transparent | Irregular | Acrylonitrile Butadiene Styrene | Direct Red 81         |
|      |    | 5  | 3 µm | Transparent | Irregular | Polyvinyl Chloride              |                       |

**Supplementary Table 3:** Description of microplastic polymers detected in human placentas from 2021(10/10). (XploRA Raman spectrometry (spectral range 300–2200 cm<sup>-1</sup>, 532 and 785 nm laser diodes, 600 lines per mm grating, library (KnowItAll - Wiley Science Solutions, Hoboken, NJ, USA; Horiba, Japan; Spectral SLOPP/SLOPPE libraries).
